# Supplementary material for: Objective User Engagement With Mental Health Apps: Systematic Search and Panel-Based Usage Analysis
Source: PubMed Central journal article supplement (PMC6785720; doi:10.2196/14567), 2019-09-25
Supplement: jmir_v21i9e14567_app3.pdf [file jmir_v21i9e14567_app3.pdf]

### Appendix 3 - List of Included Apps

| <b># of Installations</b> | <b>App name</b>                                    | <b>Company/Developer</b>                          |
|---------------------------|----------------------------------------------------|---------------------------------------------------|
| 10,000,000                | Headspace: Meditation & Mindfulness                | Headspace, Inc.                                   |
| 5,000,000                 | Calm - Meditate, Sleep, Relax                      | Calm.com, Inc.                                    |
| 5,000,000                 | Daylio - Diary, Journal, Mood Tracker              | Daylio                                            |
| 1,000,000                 | Insight Timer - Free Meditation App                | Insight Network Inc                               |
| 1,000,000                 | Meditate ॐ OM                                      | PANAGOLA                                          |
| 1,000,000                 | Prana Breath: Calm & Meditate                      | Oleksandr Albul                                   |
| 1,000,000                 | Stop, Breathe & Think: Meditation & Mindfulness    | Stop, Breathe & Think                             |
| 500,000                   | 7 Cups: Anxiety & Stress Chat                      | 7 Cups of Tea                                     |
| 500,000                   | Abide: Christian Guided Meditation & Daily Prayers | Carpenters Code Inc.                              |
| 500,000                   | Let's Meditate: Guided Meditation                  | Heal Me Team                                      |
| 500,000                   | Meditation & Relaxation: Guided Meditation         | Fitness22                                         |
| 500,000                   | Meditation Game                                    | Being                                             |
| 500,000                   | Pacifica - Stress & Anxiety                        | Pacifica Labs Inc.                                |
| 500,000                   | Relax Lite: Stress Relief                          | Saagara                                           |
| 500,000                   | Self-help Anxiety Management                       | University of the West of England                 |
| 500,000                   | Simple Habit Meditation                            | Simple Habit, Inc                                 |
| 500,000                   | The Mindfulness App: relax, calm, focus and sleep  | MindApps                                          |
| 100,000                   | 10% Happier: Meditation for Fidgety Skeptics       | 10% Happier                                       |
| 100,000                   | 21-Day Meditation Experience                       | Chopra Enterprises LLC                            |
| 100,000                   | 365 Gratitude: Journal, Grateful Community         | UofHappy, LLC                                     |
| 100,000                   | Aura: Mindfulness & Happiness                      | Aura Health                                       |
| 100,000                   | Aware: Meditation & Mindfulness                    | Zoojoo.be                                         |
| 100,000                   | Booster Buddy                                      | Island Health                                     |
| 100,000                   | Breathe2Relax                                      | T2                                                |
| 100,000                   | Calm Harm - manages self harm                      | stem4                                             |
| 100,000                   | CBT Diary                                          | Continuum                                         |
| 100,000                   | Cognitive Diary CBT Self-Help                      | Excel At Life                                     |
| 100,000                   | Depression CBT Self-Help Guide                     | Excel At Life                                     |
| 100,000                   | Free Meditation - Take a Break                     | Meditation Oasis                                  |
| 100,000                   | Gratitude Journal                                  | John De Mott                                      |
| 100,000                   | Habit - Success, Prosperity & Happiness.           | App Visionaire                                    |
| 100,000                   | Happify                                            | Happify, Inc.                                     |
| 100,000                   | Happy Habits: Choose Happiness                     | Excel At Life                                     |
| 100,000                   | InnerHour - Self Help for Anxiety & Depression     | InnerHour                                         |
| 100,000                   | Mindfulness: Guided Meditation for Stress, Anxiety | Pedby Wellness Studio                             |
| 100,000                   | MindShift™                                         | Anxiety Disorders Association of British Columbia |
| 100,000                   | Moodpath - Depression & Anxiety                    | Moodpath                                          |

| <b># of Installations</b> | <b>App name</b>                                    | <b>Company/Developer</b>               |
|---------------------------|----------------------------------------------------|----------------------------------------|
| 100,000                   | MoodSpace                                          | Boundless                              |
| 100,000                   | MoodTools - Depression Aid                         | MoodTools                              |
| 100,000                   | Moodtrack Social Diary                             | Matthew Windwer                        |
| 100,000                   | Omvana: Meditation, Yoga Sleep                     | Mindvalley LLC                         |
| 100,000                   | Qi Gong Meditation Relaxation                      | Excel At Life                          |
| 100,000                   | Smiling Mind                                       | Smiling Mind                           |
| 100,000                   | Stop Panic & Anxiety Self-Help                     | Excel At Life                          |
| 100,000                   | SuperBetter                                        | SuperBetter, LLC                       |
| 100,000                   | T2 Mood Tracker                                    | T2                                     |
| 100,000                   | TalkLife                                           | TalkLife                               |
| 100,000                   | What's Up? - Mental Health App                     | Jackson Temptra                        |
| 100,000                   | Wysa - AI therapy for stress, anxiety & depression | Touchkin                               |
| 100,000                   | Year in Pixels                                     | Teo Vogel                              |
| 100,000                   | Youper - Anxiety & Depression                      | Youper, Inc                            |
| 50,000                    | aiMei - Personality Tests & Mood Tracking          | BPU Holdings                           |
| 50,000                    | Anxiety Test                                       | MoodTools                              |
| 50,000                    | Breathing exercises                                | Zarko Petrovic                         |
| 50,000                    | Buddhify - mindfulness meditation on the go        | Mindfulness Everywhere                 |
| 50,000                    | CBT Thought Record Diary                           | MoodTools                              |
| 50,000                    | Dare - Break Free From Anxiety                     | BMD Publishing                         |
| 50,000                    | Deep Meditation: Relaxation & Sleep Meditation App | Deep Relax & Meditation                |
| 50,000                    | Depression Test                                    | MoodTools                              |
| 50,000                    | Gratitude journal - private diary & daily quotes   | Pritesh Sankhe                         |
| 50,000                    | Jealousy Test & CBT Self-Help                      | Excel At Life                          |
| 50,000                    | Kardia - Breath Stress Relief                      | Labna Sounds                           |
| 50,000                    | Mental Health Tests                                | Mind Diagnostics, Inc.                 |
| 50,000                    | Mindfulness Coach                                  | US Department of Veterans Affairs (VA) |
| 50,000                    | PTSD Coach                                         | US Department of Veterans Affairs (VA) |
| 50,000                    | Wildflowers Mindfulness                            | Mobio Interactive Inc.                 |
| 10,000                    | ACT Companion: The Happiness Trap App              | Berrick Psychology                     |
| 10,000                    | Anti Anxiety - Depression, Stress, Panic Attack    | App Visionaire                         |
| 10,000                    | Breath Ball: The Stress Relief Breathing Exercise. | Fun Driven                             |
| 10,000                    | Breathe Easy                                       | MoodTools                              |
| 10,000                    | Catch It                                           | The University of Liverpool            |
| 10,000                    | Cognitive Behavioral Therapy: Depression & Anxiety | NKDigital                              |
| 10,000                    | FearTools - Anxiety Aid                            | MoodTools                              |
| 10,000                    | Flowy Beta                                         | Playlab London                         |
| 10,000                    | How Are You? - Mood tracker                        | Psykolog Lene Bammeskov                |

| <b># of Installations</b> | <b>App name</b>                                    | <b>Company/Developer</b>                    |
|---------------------------|----------------------------------------------------|---------------------------------------------|
| 10,000                    | iMoodJournal                                       | Inexika Inc.                                |
| 10,000                    | MindCare: mental well-being analytics made easy    | Blue Bird Technologies                      |
| 10,000                    | Mood Log                                           | AR Productions Inc.                         |
| 10,000                    | Mood Triggers: Anxiety Depression Insomnia Tracker | Mood Triggers: Anxiety & Depression Tracker |
| 10,000                    | MoodMission - Cope with Stress, Moods & Anxiety    | MoodMission Pty Ltd                         |
| 10,000                    | Panic Attacks?                                     | ilovepanicattacks                           |
| 10,000                    | PanicShield - Panic Attack Aid                     | MoodTools                                   |
| 10,000                    | Rootd - Panic Attack & Anxiety Relief              | Simply Rooted Media                         |
| 10,000                    | Social Anxiety Test                                | MoodTools                                   |
| 10,000                    | Stories – Timeline Diary / Journal, Mood Tracker   | Hadi Satrio                                 |
| 10,000                    | Stress Management                                  | ap developers                               |
| 10,000                    | Tactical Breather                                  | T2                                          |
| 10,000                    | The Anxiety Guy Podcasts - Fear, Depression Relief | Pitashi Mobile Imagination                  |
| 10,000                    | The Happiness Planner                              | BRANDMENTALIST LLC                          |
| 10,000                    | Thought Challenger                                 | CBITs                                       |
| 10,000                    | TruReach - Anxiety, Stress & Depression            | TruReach Health                             |
| 10,000                    | Woebot - CBT for Stress, Anxiety & Depression      | Woebot Labs                                 |
| 10,000                    | Worry Knot                                         | CBITs                                       |
